# Supplementary material
Source: Springer Nature journal article supplement (https://www.springermedizin.de/resource/supplementary/12887_2010_425_MOESM1_ESM.pdf/9475090)

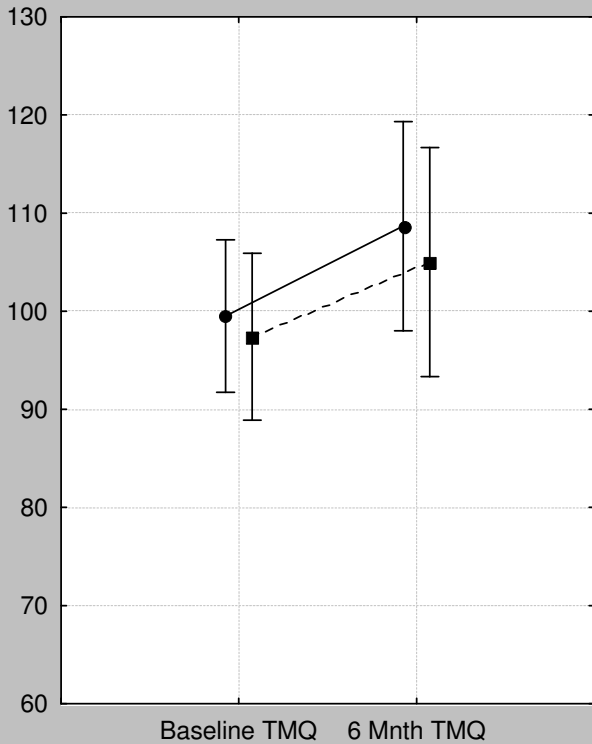

HIV negative

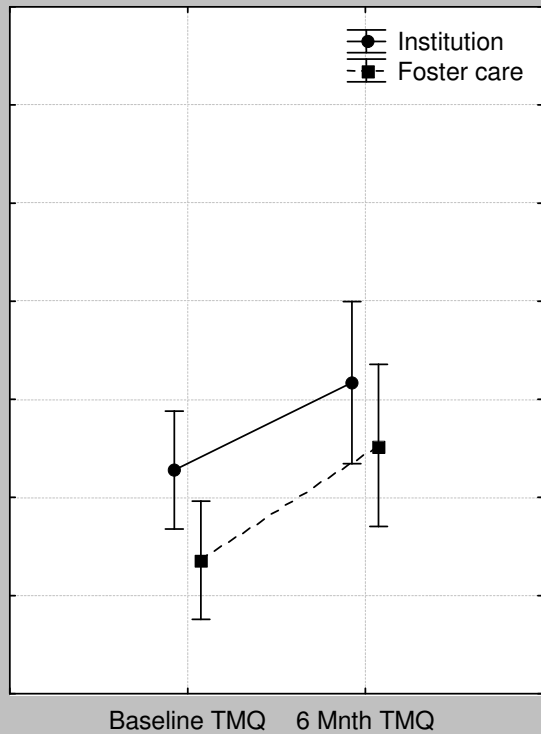

HIV positive

Supplement: MOESM1 [file 9475090]
